# Supplementary material for: Molecular modeling studies and in vitro screening of dihydrorugosaflavonoid and its derivatives against Mycobacterium tuberculosis
Source: Royal Society of Chemistry journal article supplement (doi:10.1039/c8ra00636a), 2018-01-01

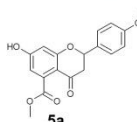

**5a**  
Mol. Formula: C<sub>18</sub>H<sub>16</sub>O<sub>6</sub>  
Mol. Weight: 328.31

### LCMS REPORT

Column : X-Select CSH C18 (3.0\*50) mm 2.5μ  
Mobile Phase: A: 0.05% Formic acid in water + 5%ACN  
B: 0.05% Formic acid in Acetonitrile  
Inj Volume: 2.0μL  
Flow Rate: 1.2 mL/minute  
Gradient program:  
0% B to 98% B in 2.0 minute, hold till 3.0 min, at 3.2 min B conc is 0% up to 4.0 min

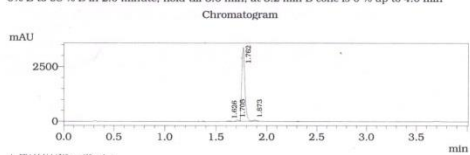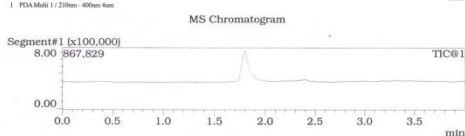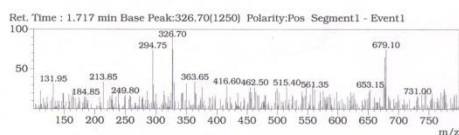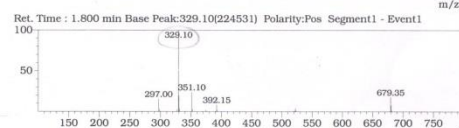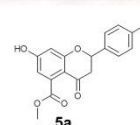

**5a**  
Mol. Formula: C<sub>18</sub>H<sub>16</sub>O<sub>6</sub>  
Mol. Weight: 328.31

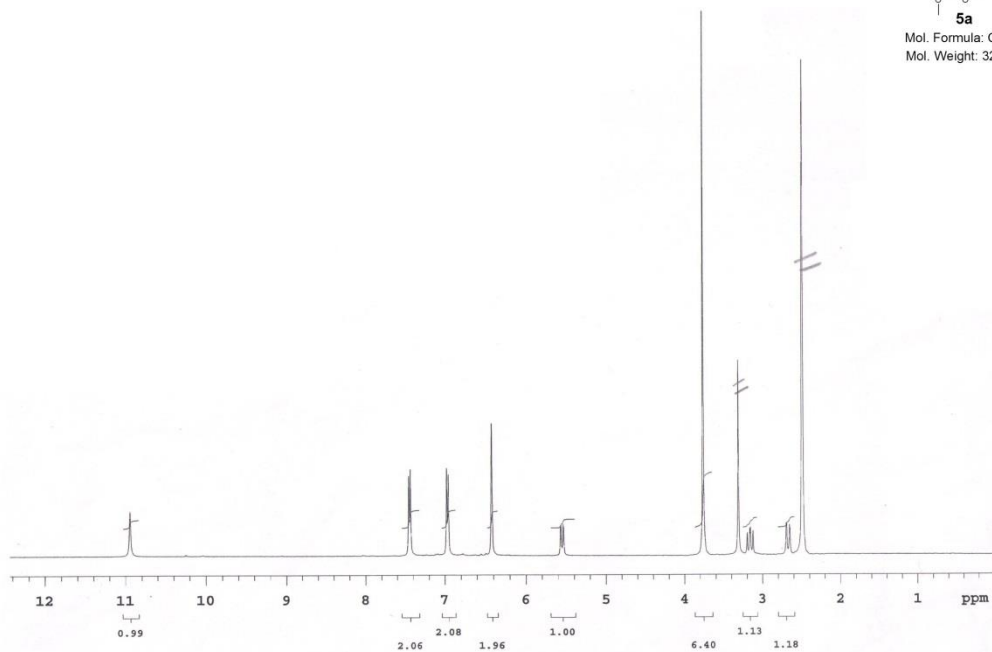

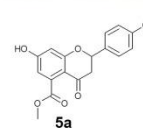

Mol. Formula: C<sub>18</sub>H<sub>16</sub>O<sub>6</sub>  
 Mol. Weight: 328.31

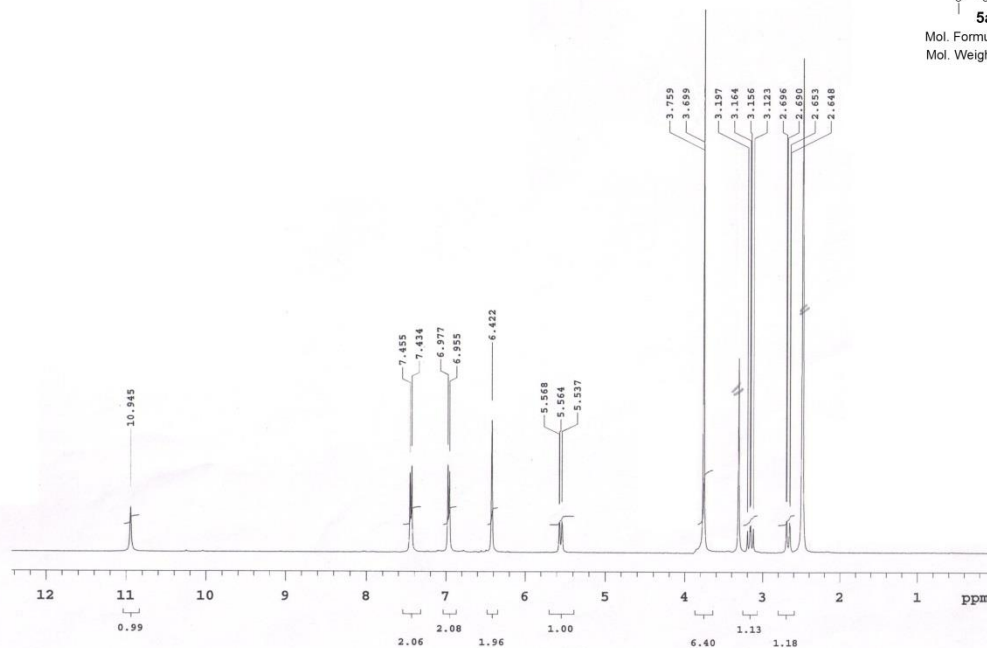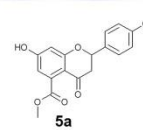

Mol. Formula: C<sub>18</sub>H<sub>16</sub>O<sub>6</sub>  
 Mol. Weight: 328.31

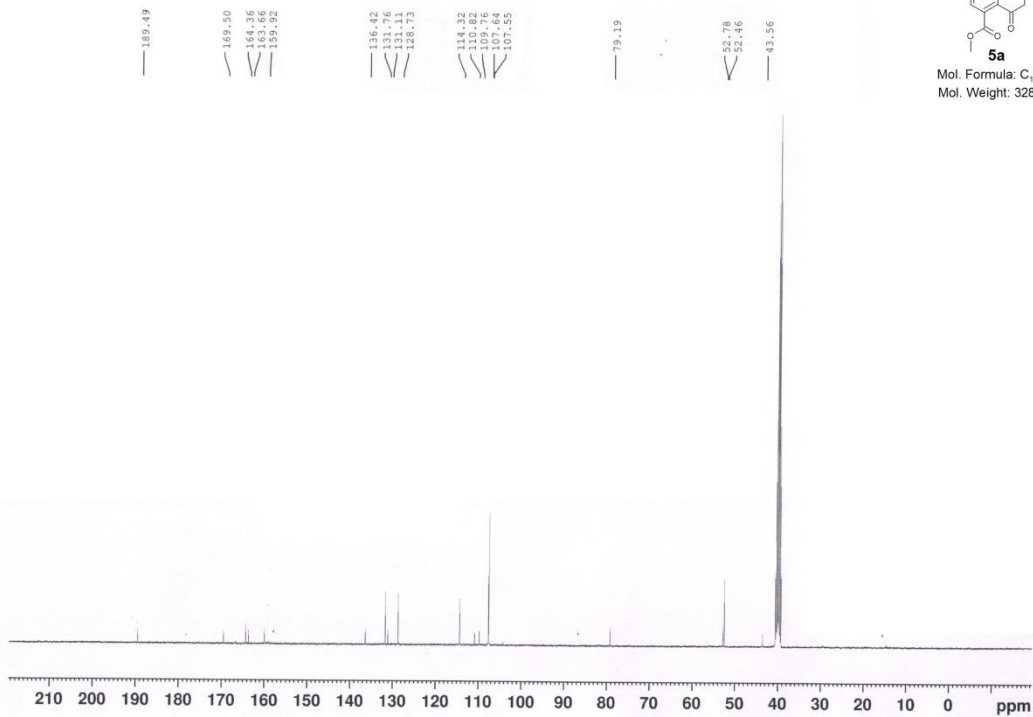

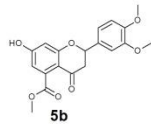

Mol. Formula: C<sub>19</sub>H<sub>16</sub>O<sub>7</sub>  
Mol. Weight: 358.34

LCMS REPORT

Column: X-Select CSH C18 (3.0\*50) mm 2.5μ  
Mobile Phase: A: 0.05% Formic acid in water + 5%ACN  
B: 0.05% Formic acid in Acetonitrile  
Inj Volume: 2.0μL  
Flow Rate: 1.2 mL/minute  
Gradient program:  
0% B to 98 % B in 2.0 minute, hold till 3.0 min, at 3.2 min B conc is 0 % up to 4.0 min

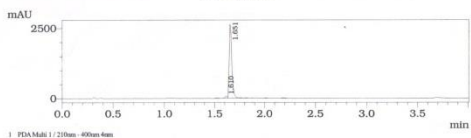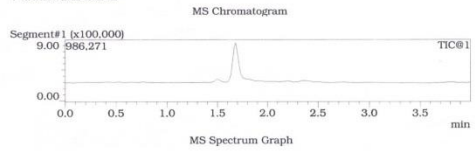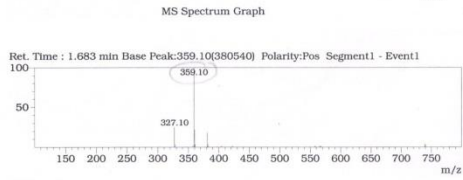

Ret. Time : 1.683 min Base Peak:359.10(380540) Polarity:Pos Segment1 - Event1

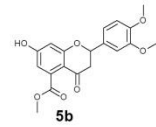

Mol. Formula: C<sub>19</sub>H<sub>16</sub>O<sub>7</sub>  
Mol. Weight: 358.34

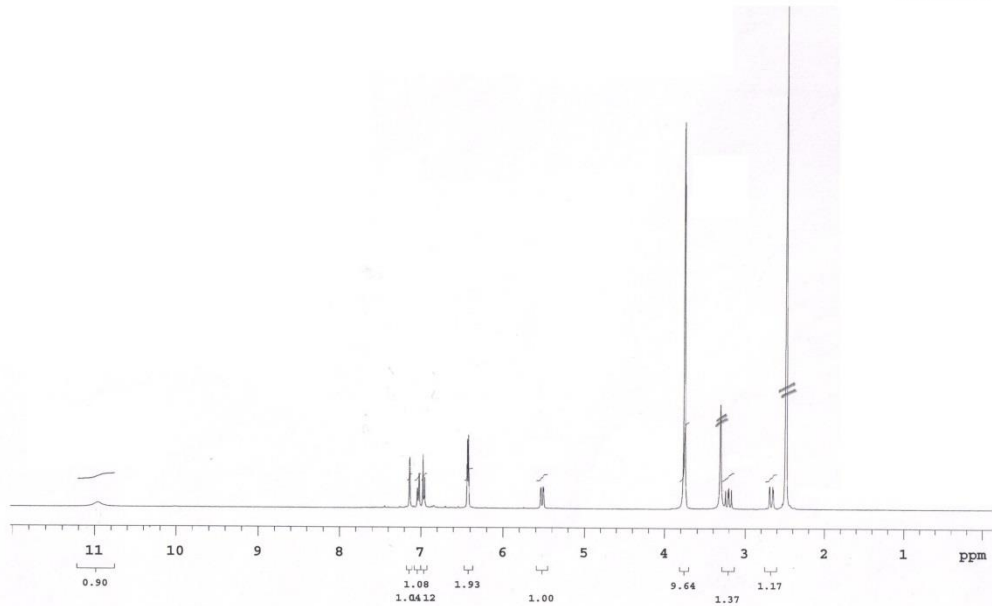

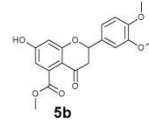

Mol. Formula: C<sub>19</sub>H<sub>18</sub>O<sub>7</sub>  
 Mol. Weight: 358.34

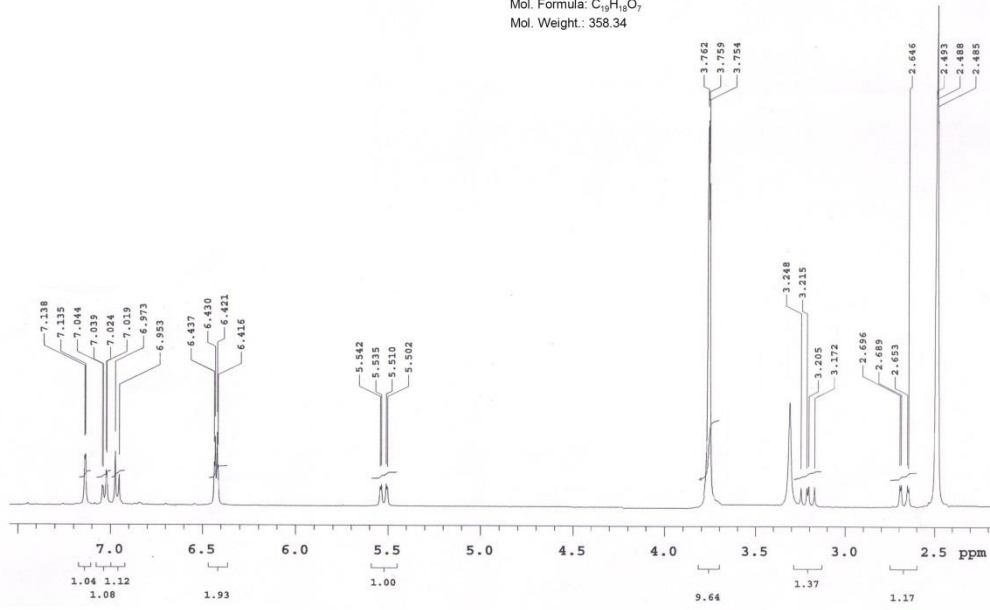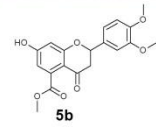

Mol. Formula: C<sub>19</sub>H<sub>18</sub>O<sub>7</sub>  
 Mol. Weight: 358.34

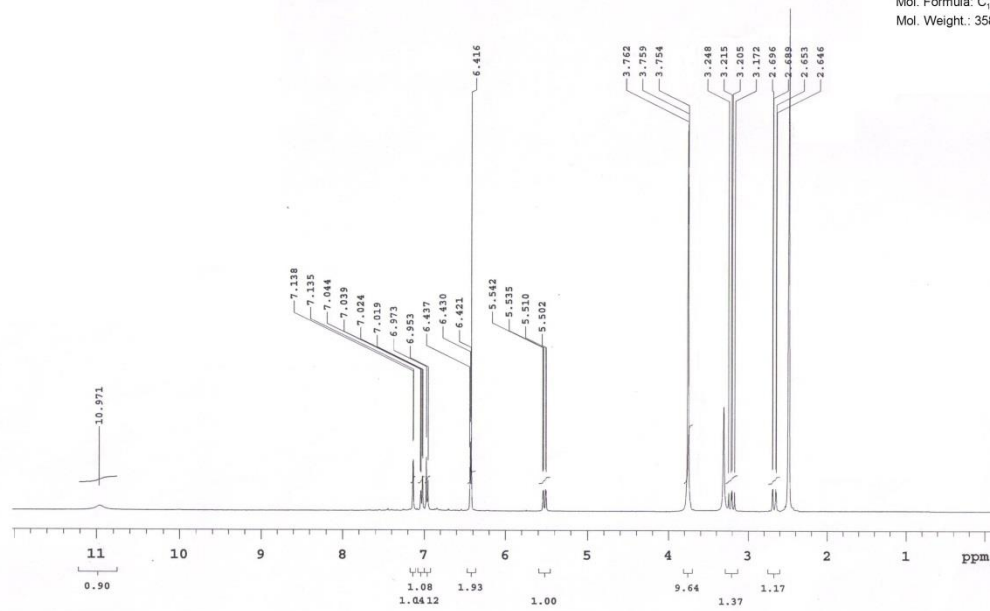

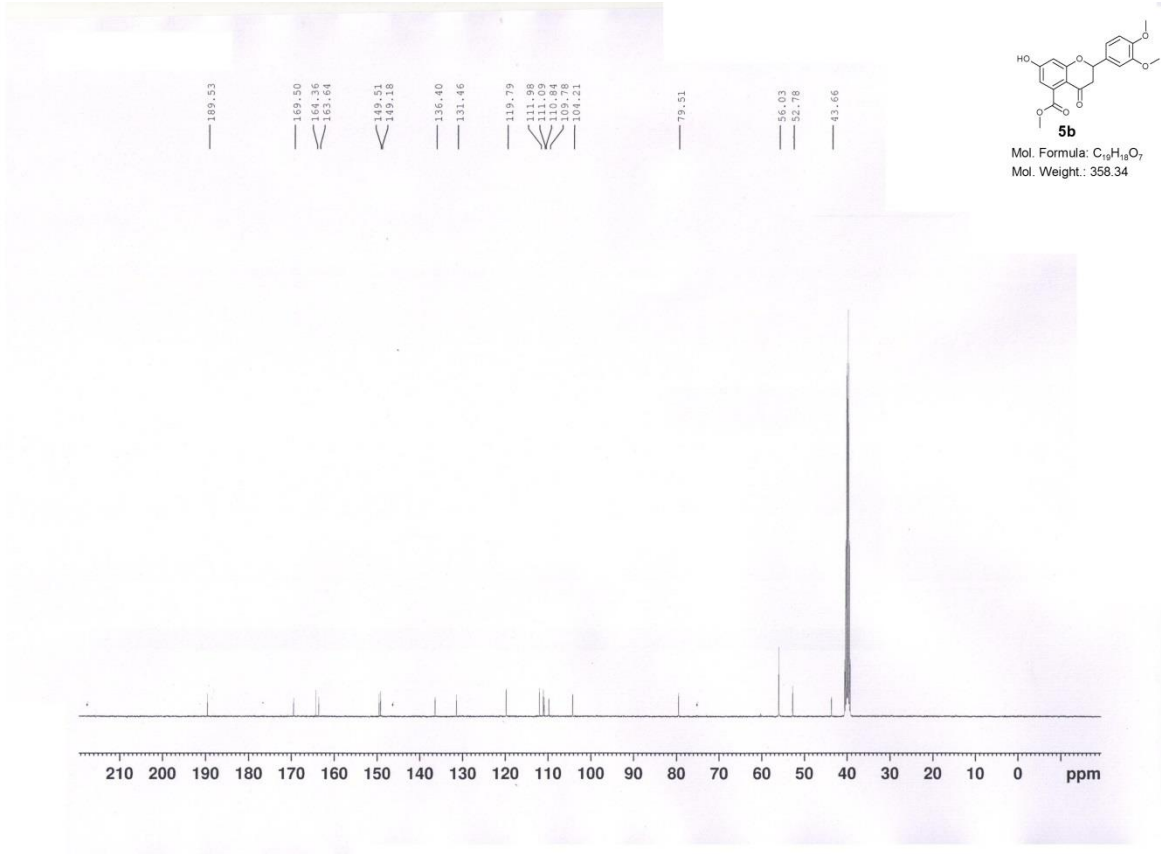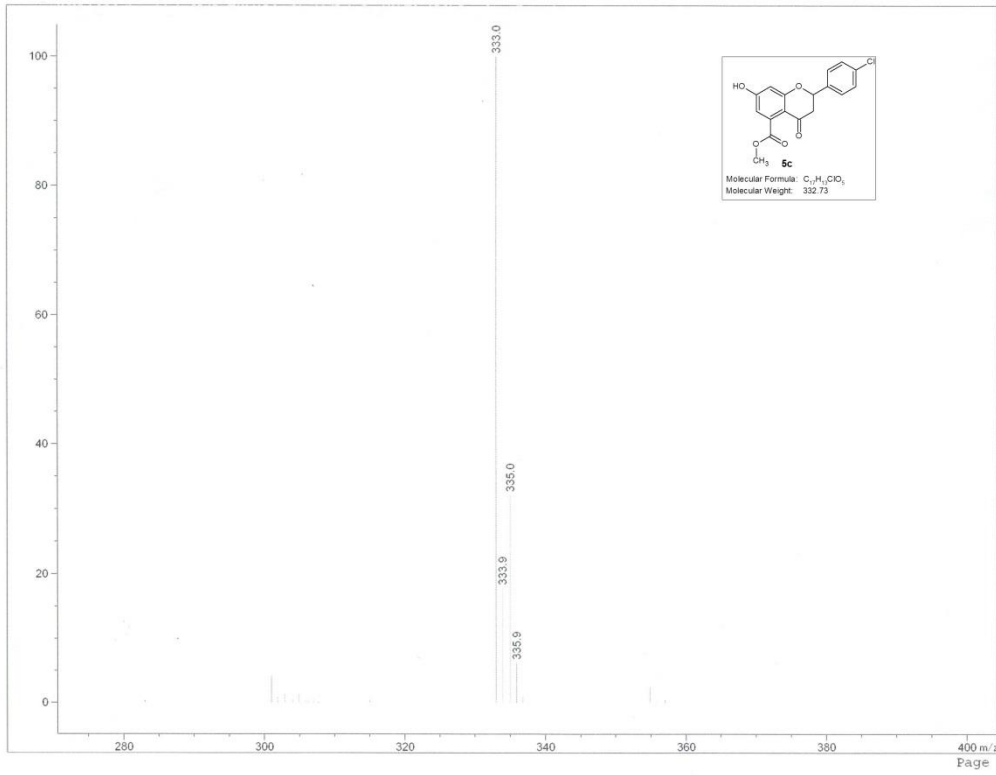

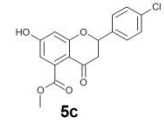

Mol. Formula: C<sub>17</sub>H<sub>13</sub>ClO<sub>5</sub>  
Mol. Weight: 332.73

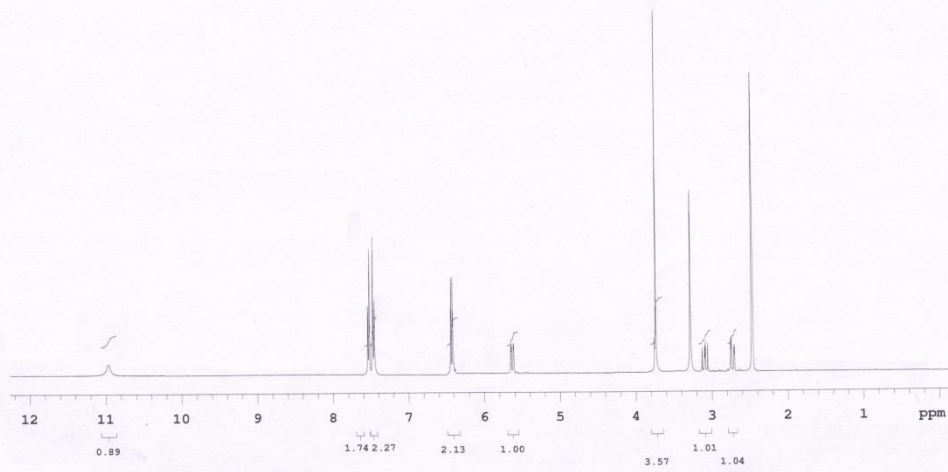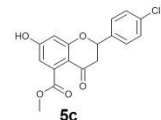

Mol. Formula: C<sub>17</sub>H<sub>13</sub>ClO<sub>5</sub>  
Mol. Weight: 332.73

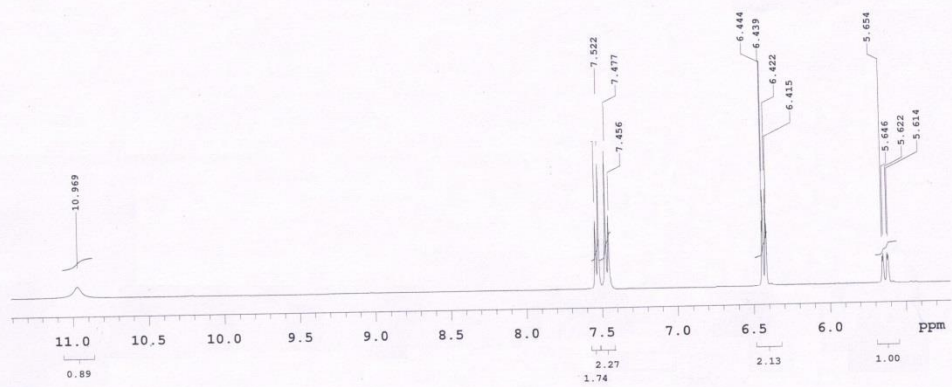

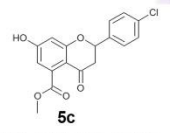

Mol. Formula:  $C_{17}H_{13}ClO_5$   
 Mol. Weight: 332.73

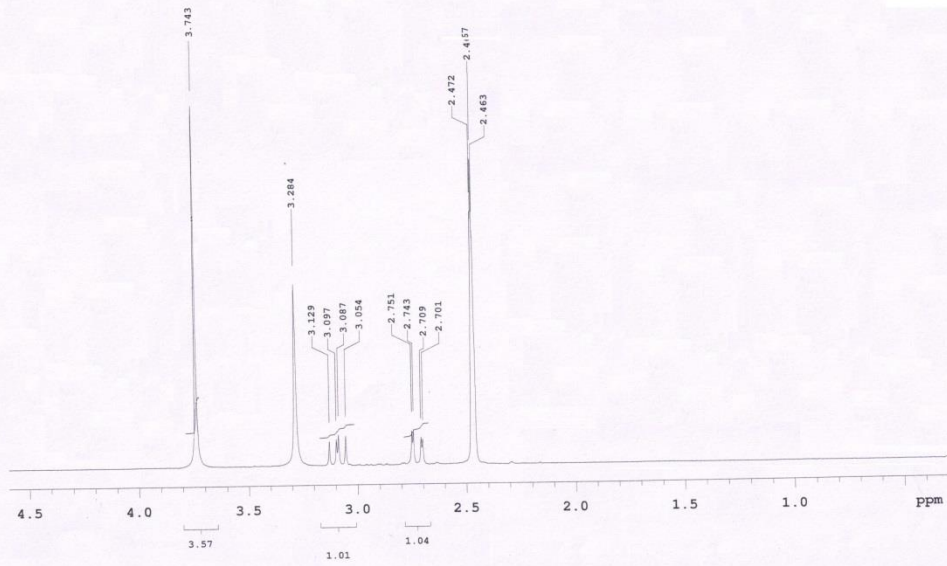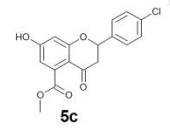

Mol. Formula:  $C_{17}H_{13}ClO_5$   
 Mol. Weight: 332.73

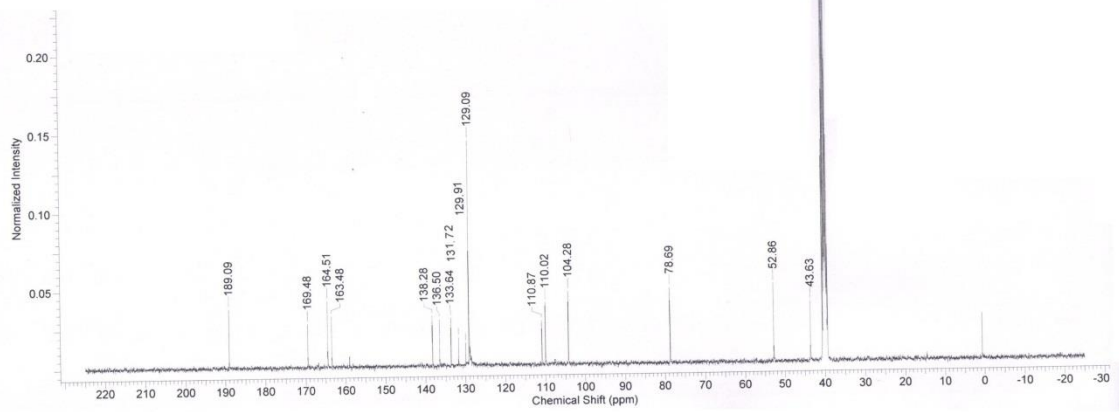

MS Spectrum

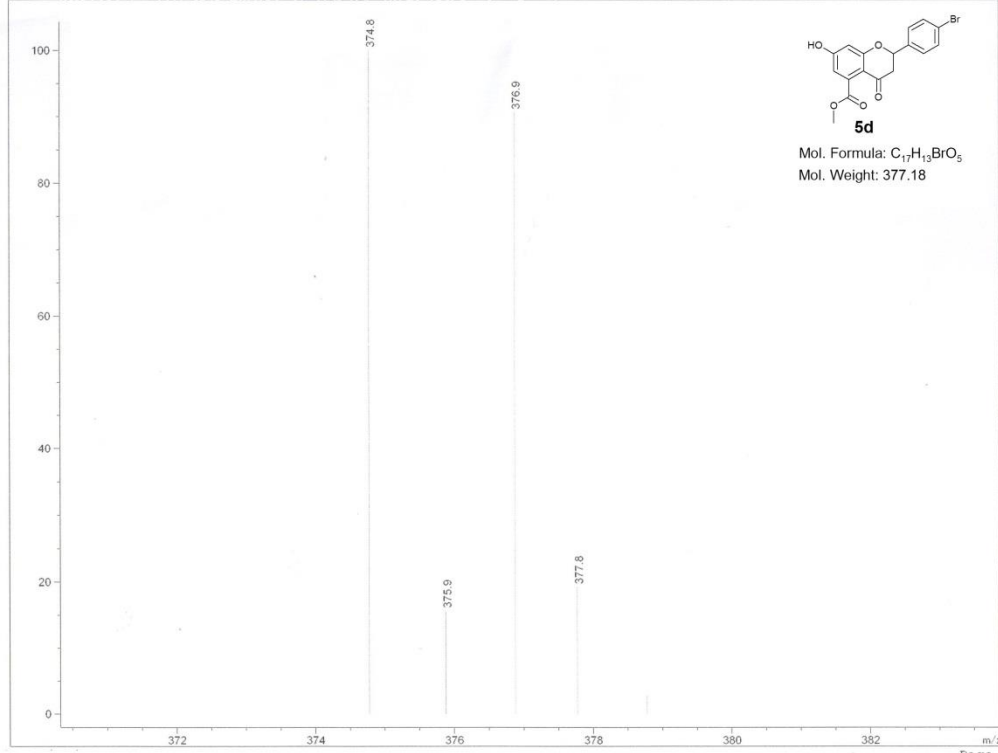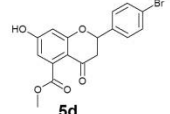

**5d**

Mol. Formula: C<sub>17</sub>H<sub>13</sub>BrO<sub>5</sub>  
Mol. Weight: 377.18



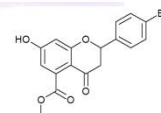

**5d**

Mol. Formula: C<sub>17</sub>H<sub>13</sub>BrO<sub>5</sub>  
Mol. Weight: 377.18

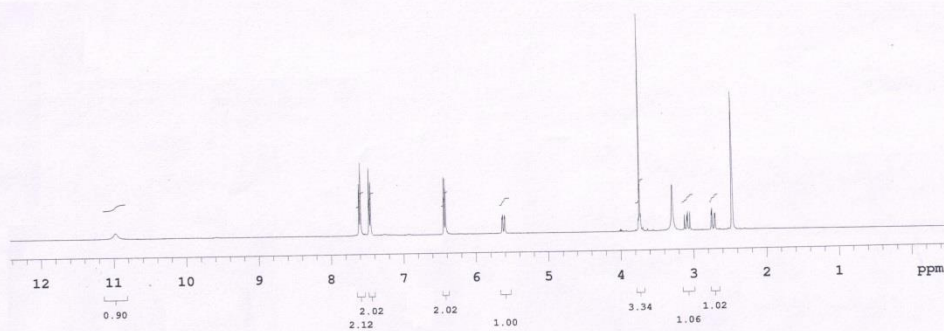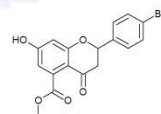

**5d**

Mol. Formula: C<sub>17</sub>H<sub>13</sub>BrO<sub>5</sub>  
Mol. Weight: 377.18

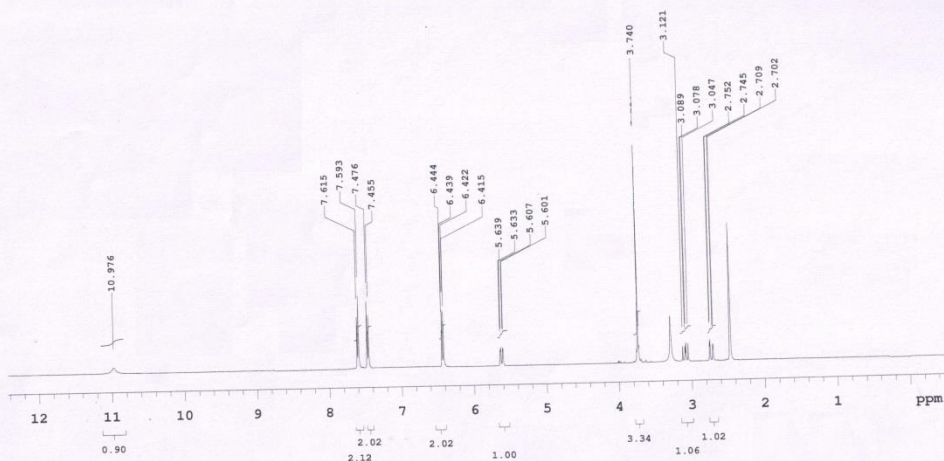

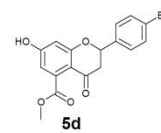

Mol. Formula: C<sub>17</sub>H<sub>13</sub>BrO<sub>3</sub>  
Mol. Weight: 377.18

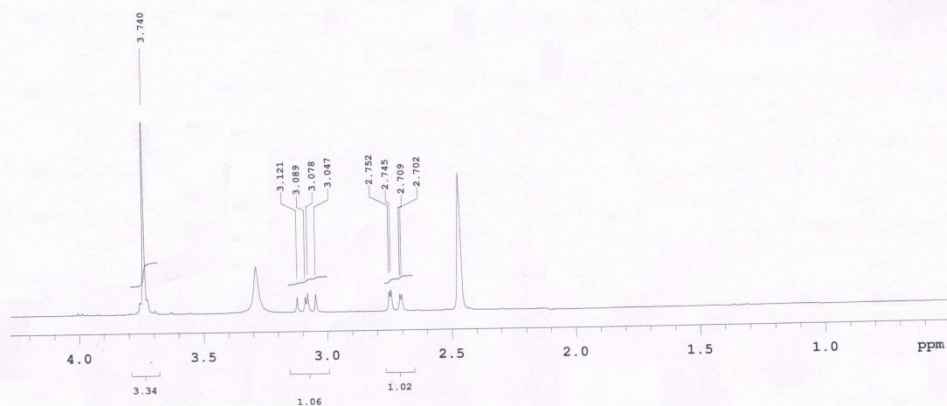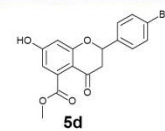

Mol. Formula: C<sub>17</sub>H<sub>13</sub>BrO<sub>3</sub>  
Mol. Weight: 377.18

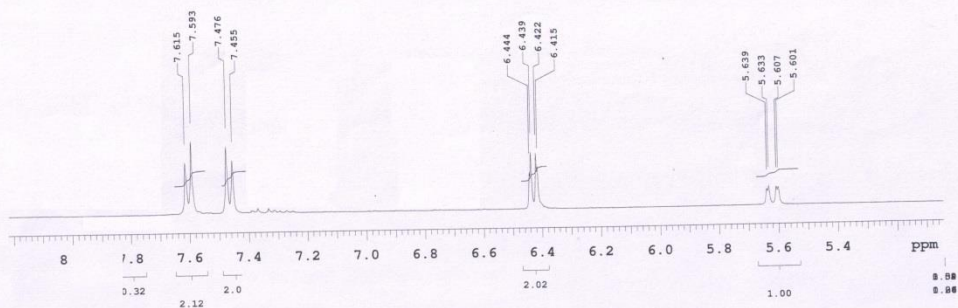

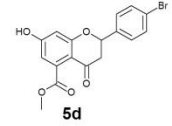

Mol. Formula:  $C_{17}H_{13}BrO_5$   
 Mol. Weight: 377.18

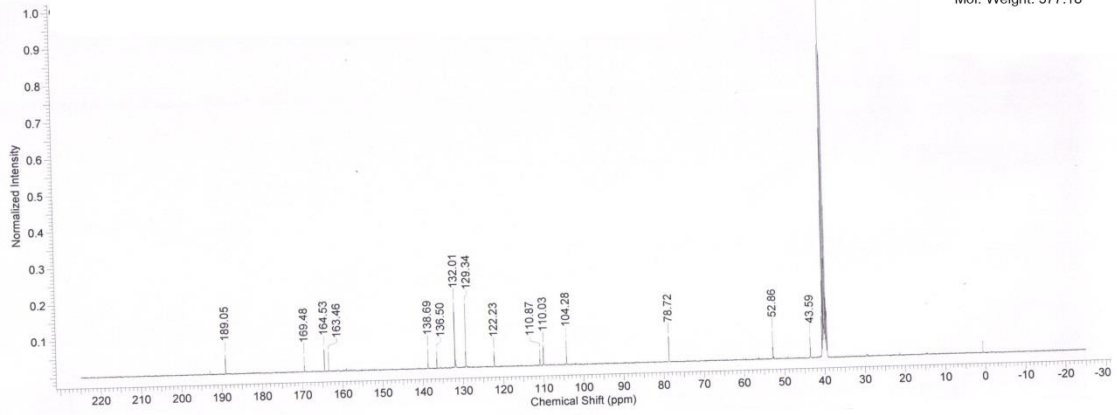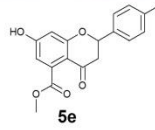

Mol. Formula:  $C_{18}H_{16}O_5$   
 Mol. Weight: 312.31

LCMS REPORT

Column : X-Select CSH (3.0\*50) mm 2.5u  
 Mobile Phase: A: 0.05% Formic acid in water+5%ACN  
 B: 0.05% Formic acid in ACN  
 Inj Volume: 2.0ul  
 Flow Rate: 1.5, mL/minute  
 Gradient program:  
 0% B to 98 % B in 2.0 minute, Hold till 3.0 min. At 3.2 min B conc is 0 % up to 4.0 min

Chromatogram

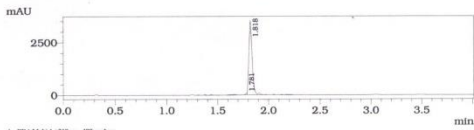

1 FIA Multi 1 / 210mm - 400nm 4nm

MS Chromatogram

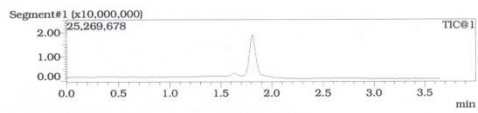

MS Spectrum Graph

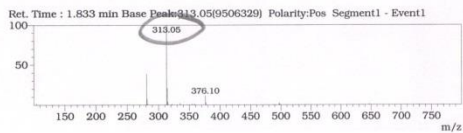

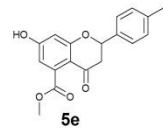

Mol. Formula:  $C_{18}H_{16}O_5$   
 Mol. Weight: 312.31

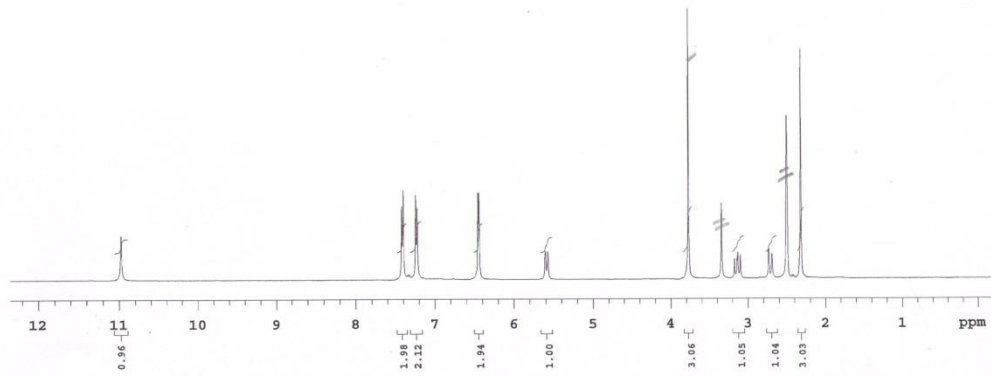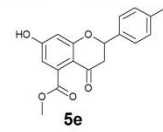

Mol. Formula:  $C_{18}H_{16}O_5$   
 Mol. Weight: 312.31

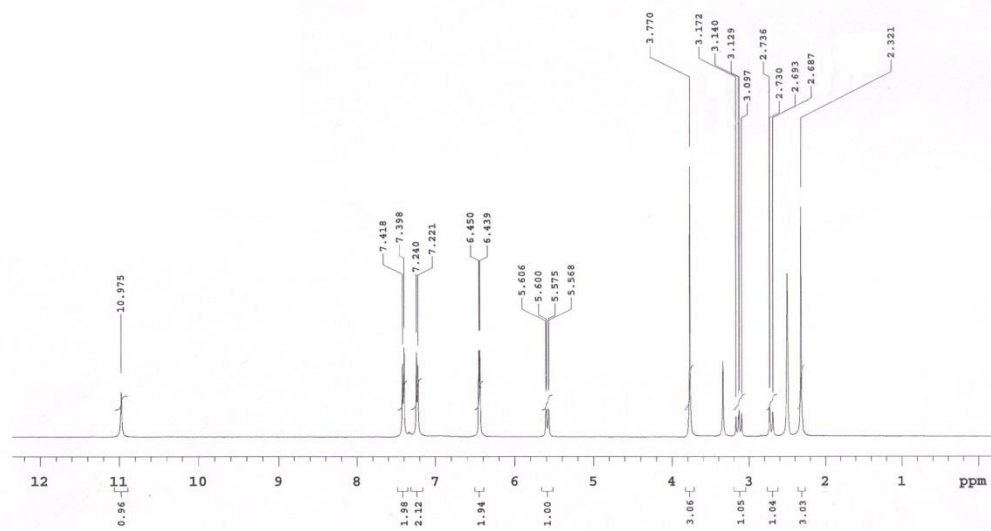

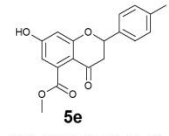

Mol. Formula: C<sub>18</sub>H<sub>16</sub>O<sub>5</sub>  
Mol. Weight: 312.31

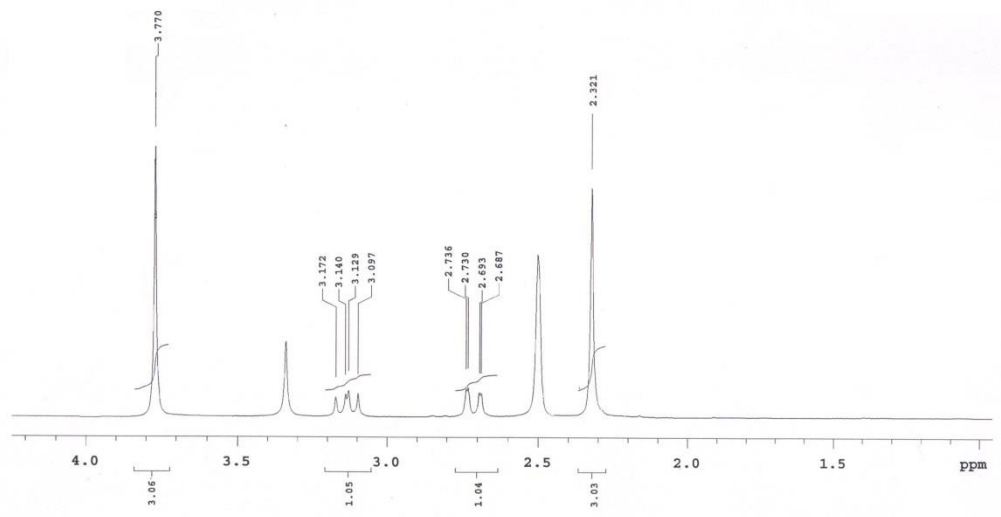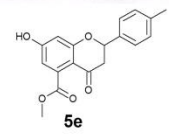

Mol. Formula: C<sub>18</sub>H<sub>16</sub>O<sub>5</sub>  
Mol. Weight: 312.31

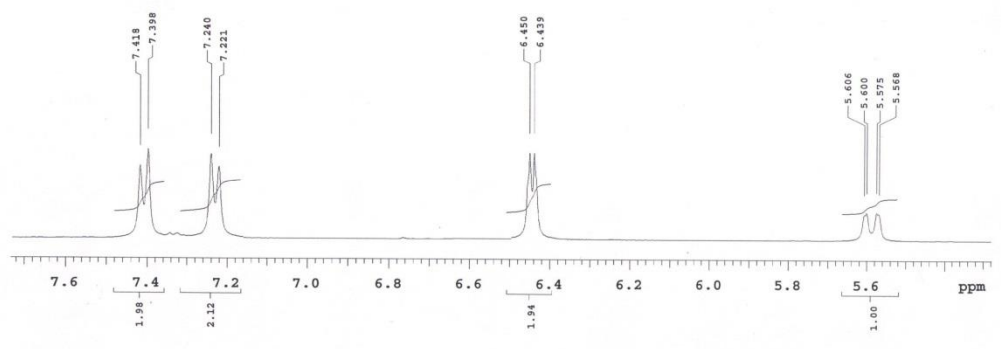

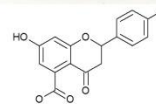

**5e**

Mol. Formula:  $C_{18}H_{16}O_5$   
Mol. Weight: 312.31

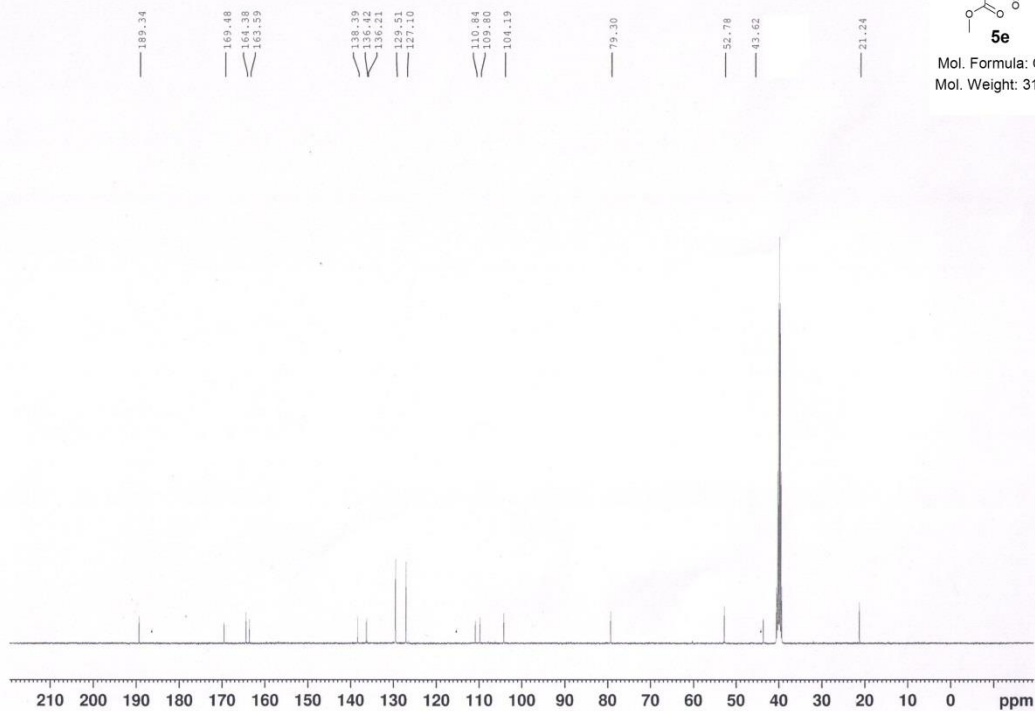

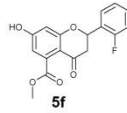

Mol. Formula: C<sub>17</sub>H<sub>13</sub>FO<sub>3</sub>  
 Mol. Weight: 316.28

LCMS REPORT

Column : X-Select CSH (3.0\*50) mm 2.5μ  
 Mobile Phase: A: 0.05% Formic acid in water+5%ACN  
 B: 0.05% Formic acid in ACN  
 Inj Volume: 2.0 μL  
 Flow Rate: 1.5 mL/minute  
 Gradient program:  
 0% B to 98 % B in 2.0 minute. Hold till 3.0 min. At 3.2 min B conc is 0 % up to 4.0 min

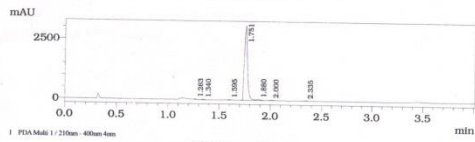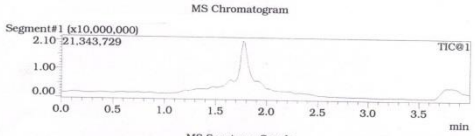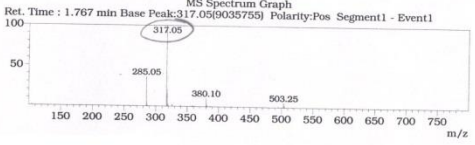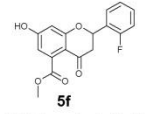

Mol. Formula: C<sub>17</sub>H<sub>13</sub>FO<sub>3</sub>  
 Mol. Weight: 316.28

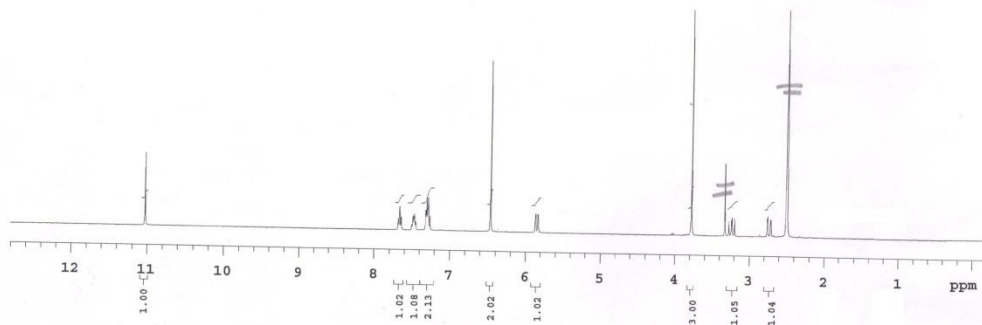

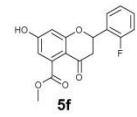

Mol. Formula: C<sub>17</sub>H<sub>13</sub>FO<sub>5</sub>  
 Mol. Weight: 316.28

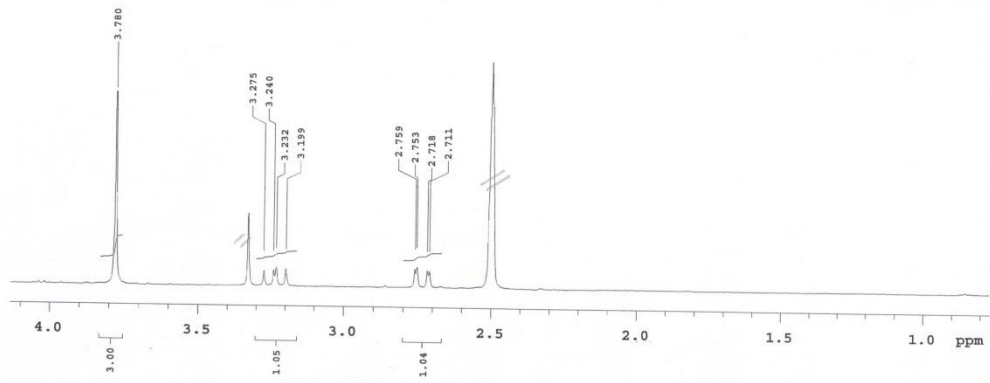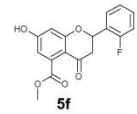

Mol. Formula: C<sub>17</sub>H<sub>13</sub>FO<sub>5</sub>  
 Mol. Weight: 316.28

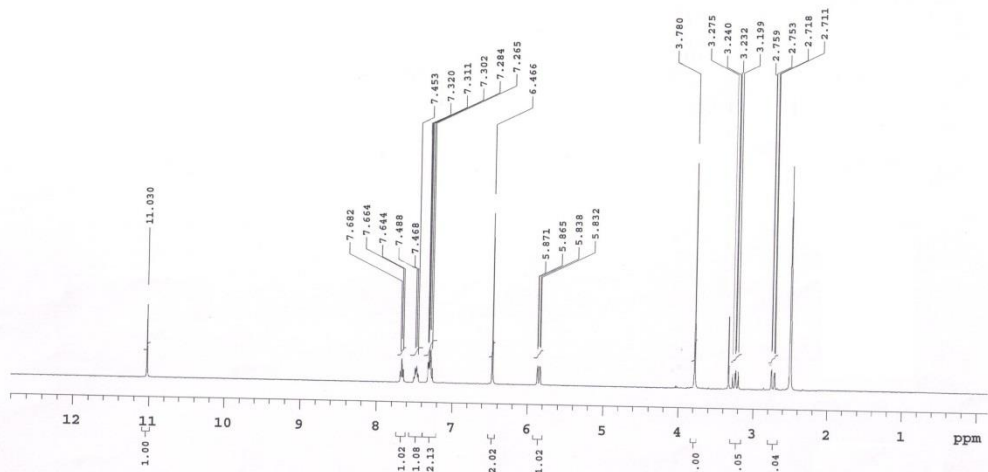



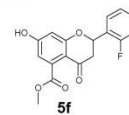

**5f**

Mol. Formula: C<sub>17</sub>H<sub>13</sub>FO<sub>3</sub>  
Mol. Weight: 316.28

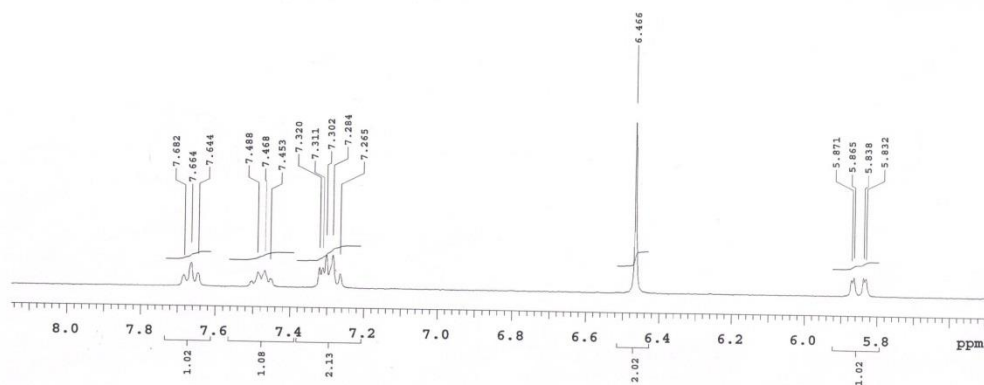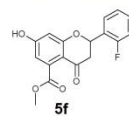

**5f**

Mol. Formula: C<sub>17</sub>H<sub>13</sub>FO<sub>3</sub>  
Mol. Weight: 316.28

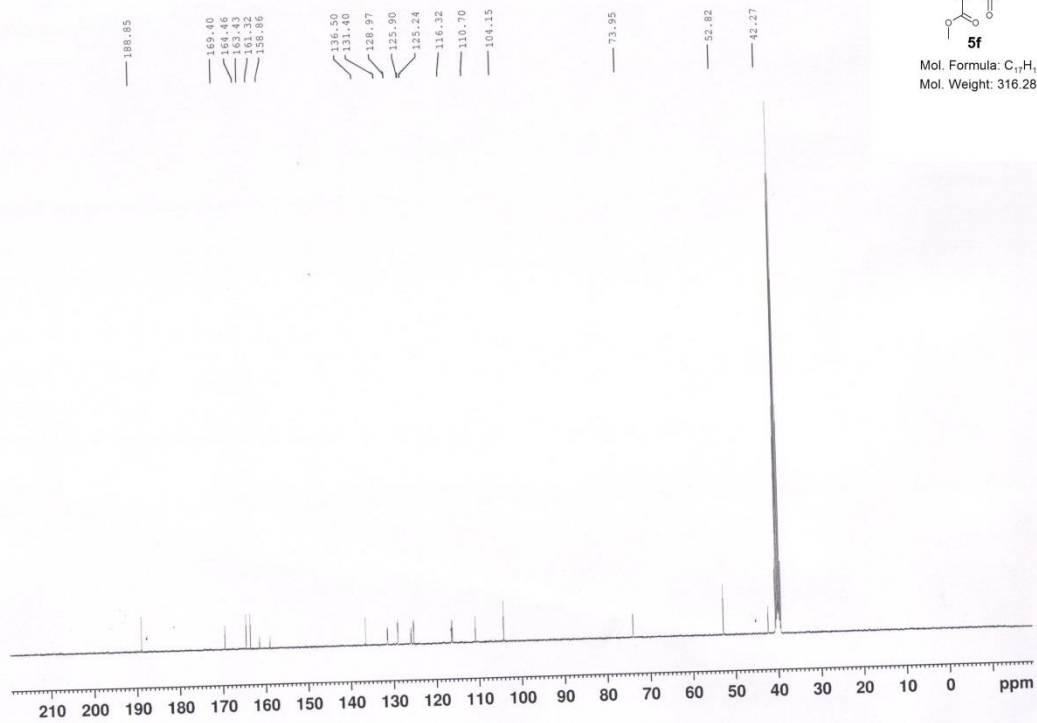

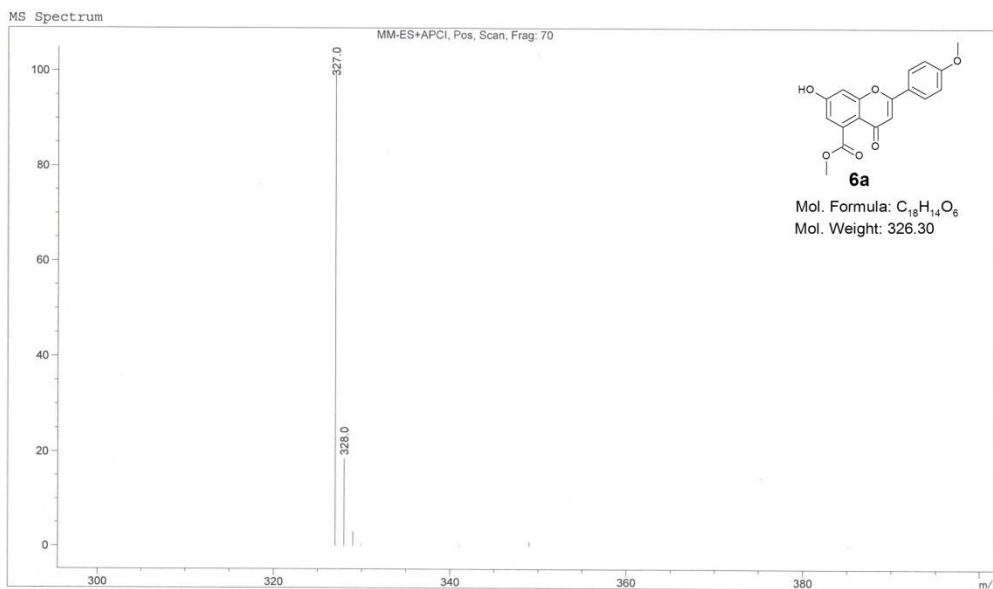

Page 1 of 1

ARI-14  
PROTON\_DepttChem DMSO {D:\AGARKAR} CIF 30

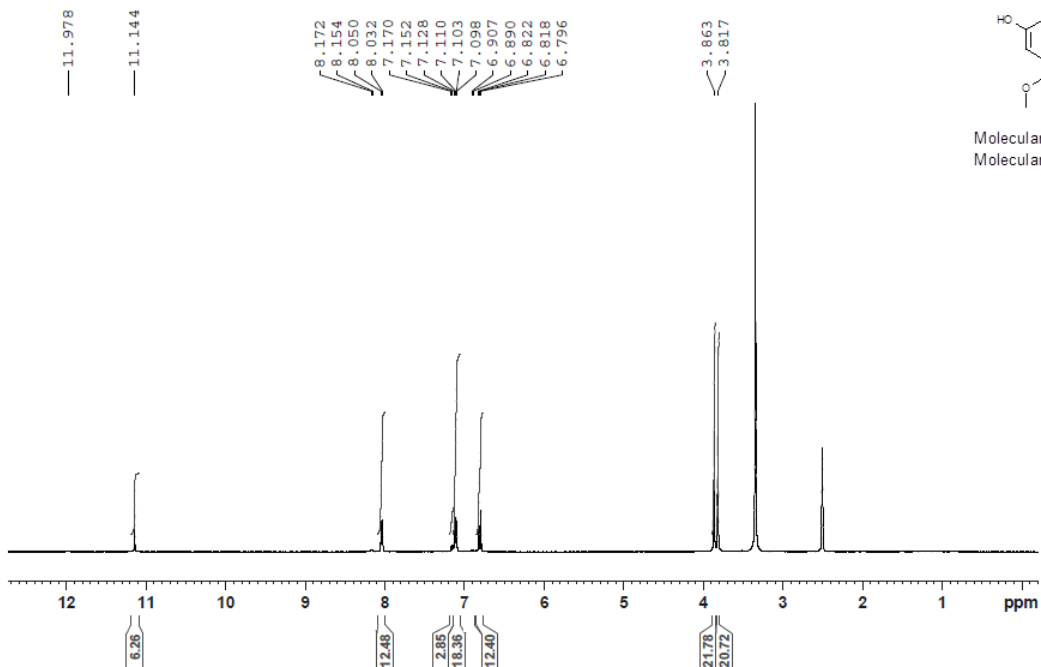

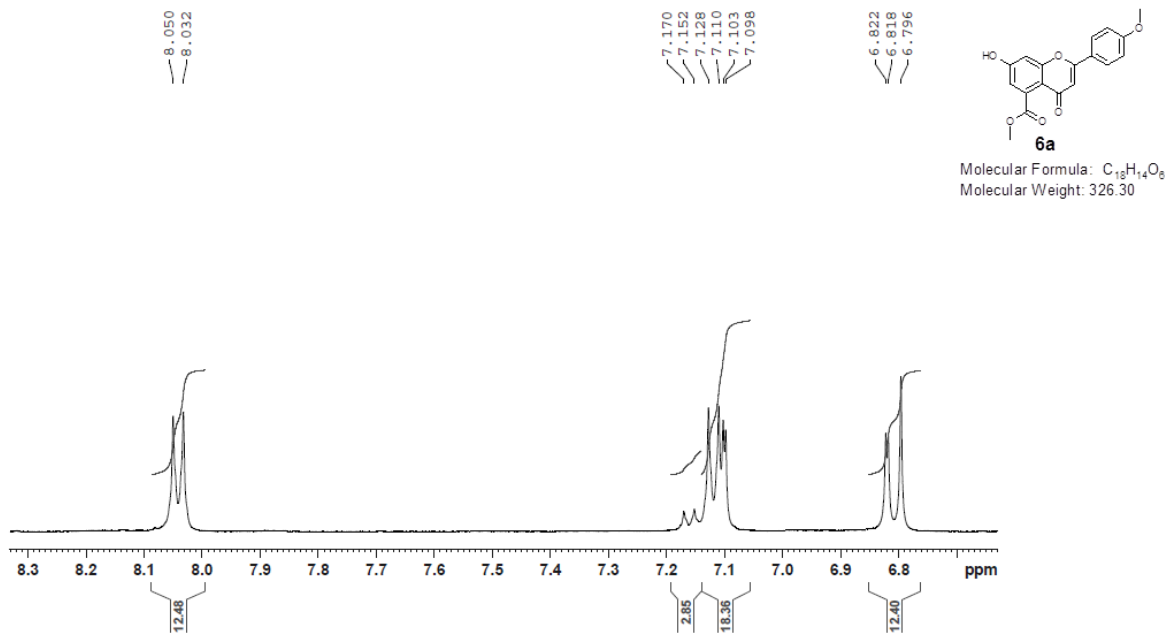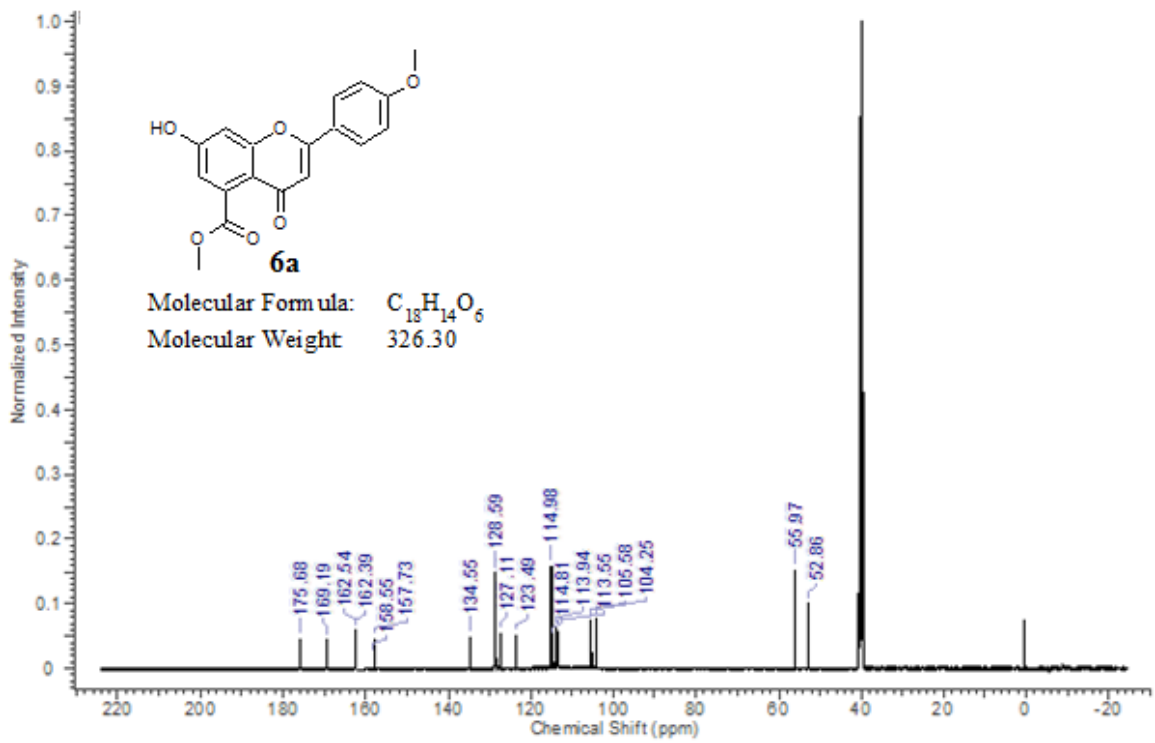

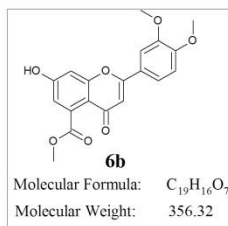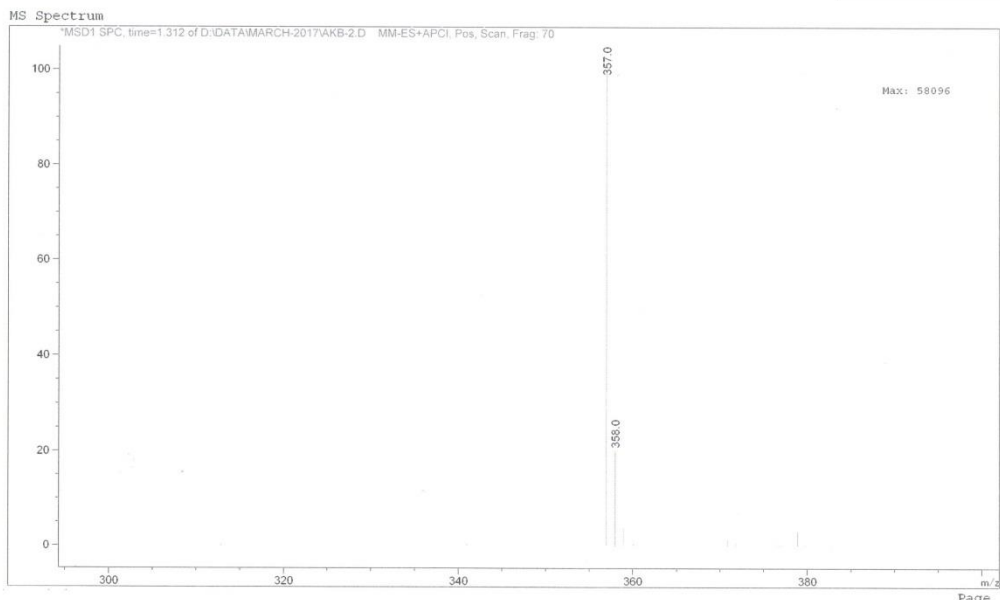

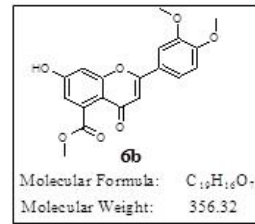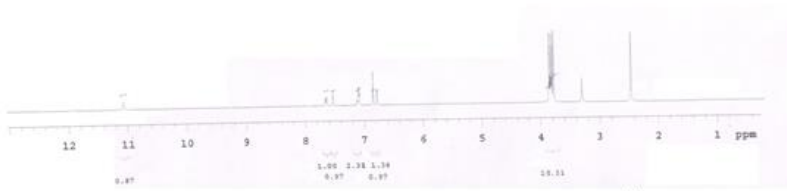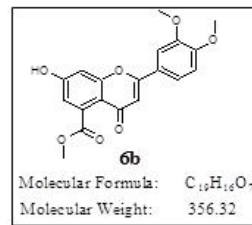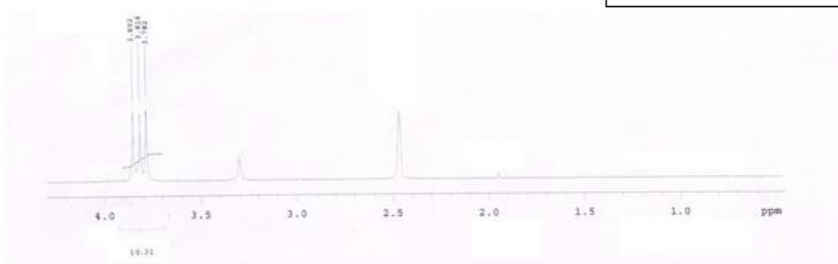

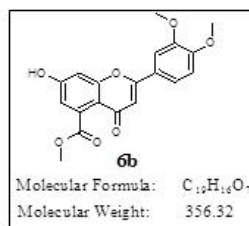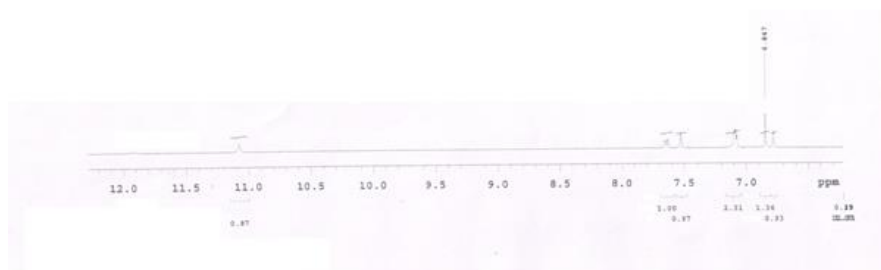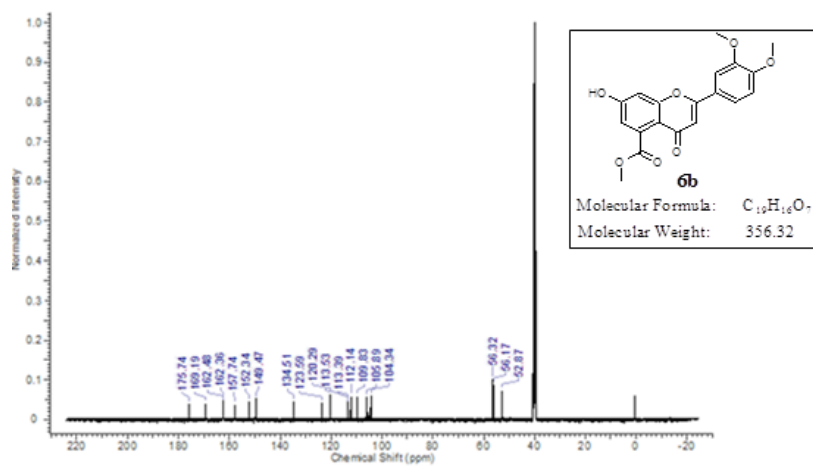

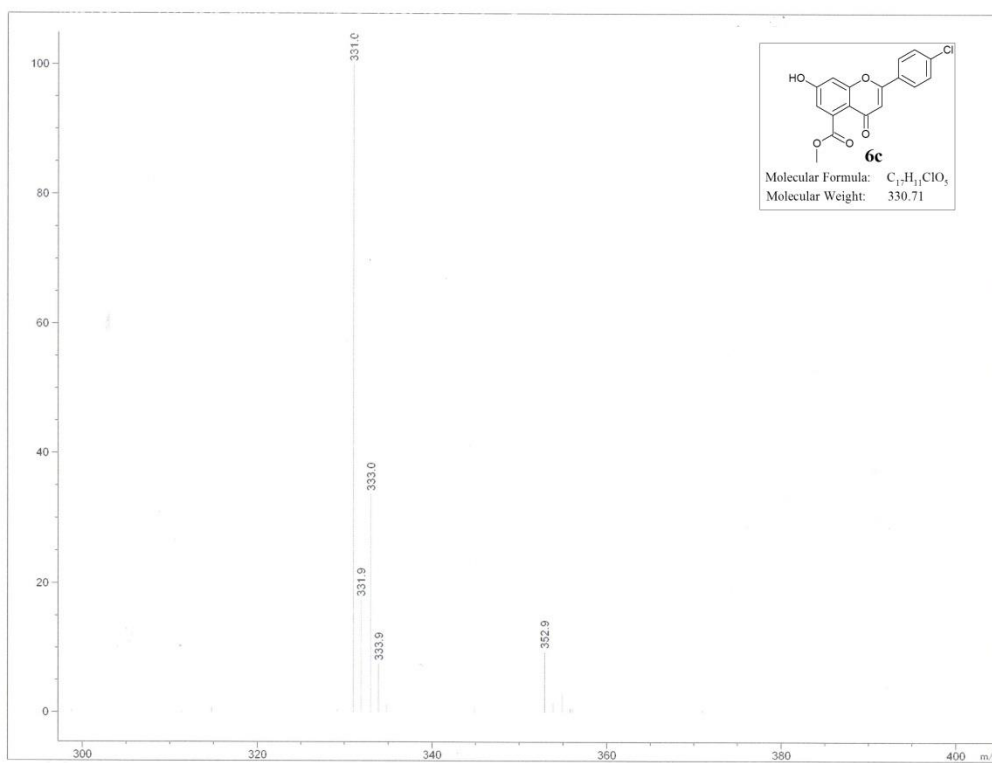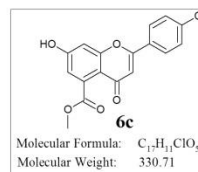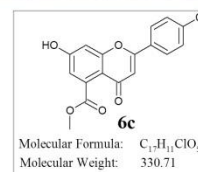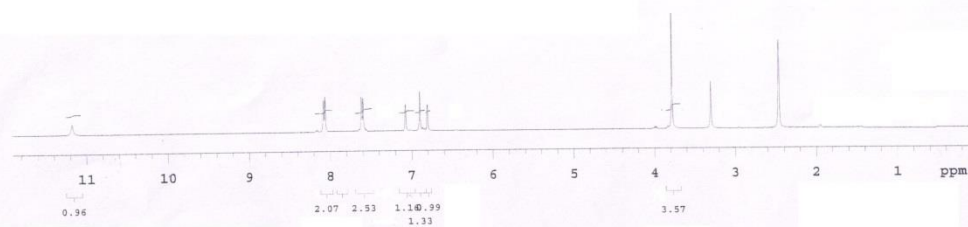

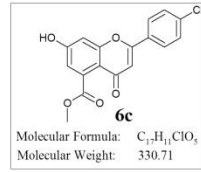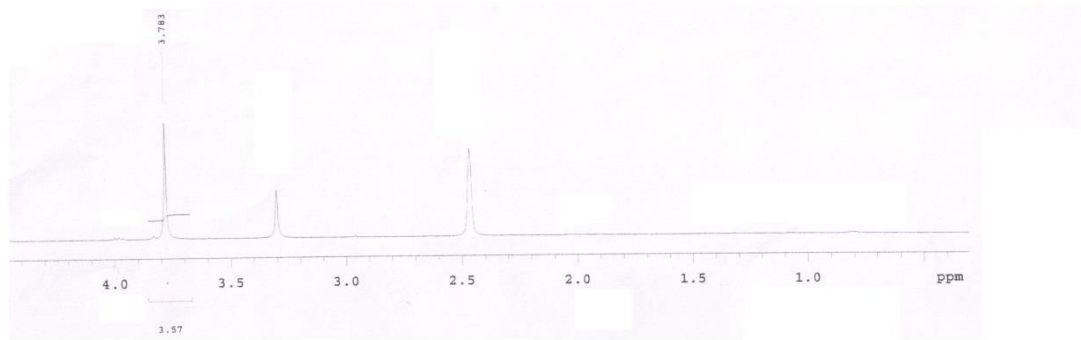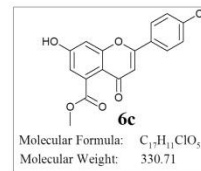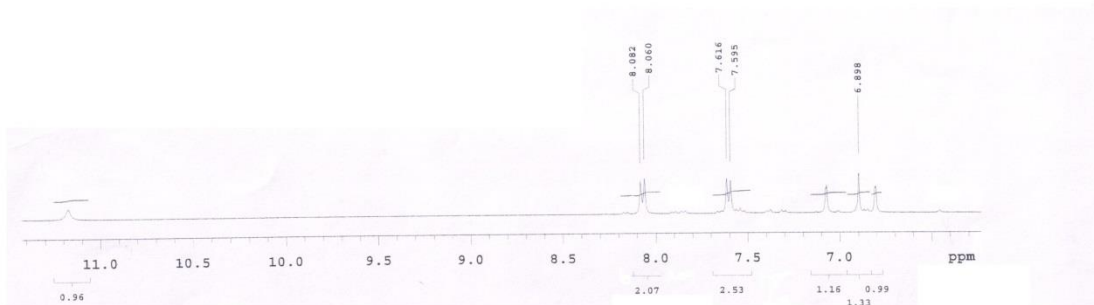



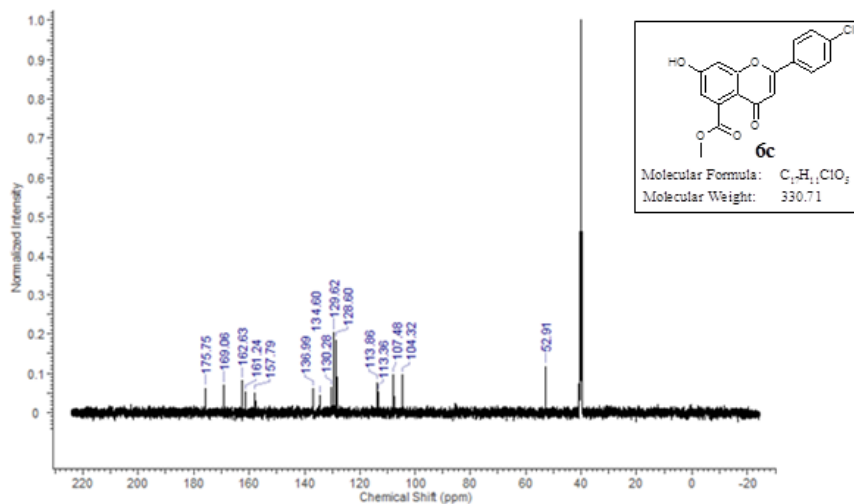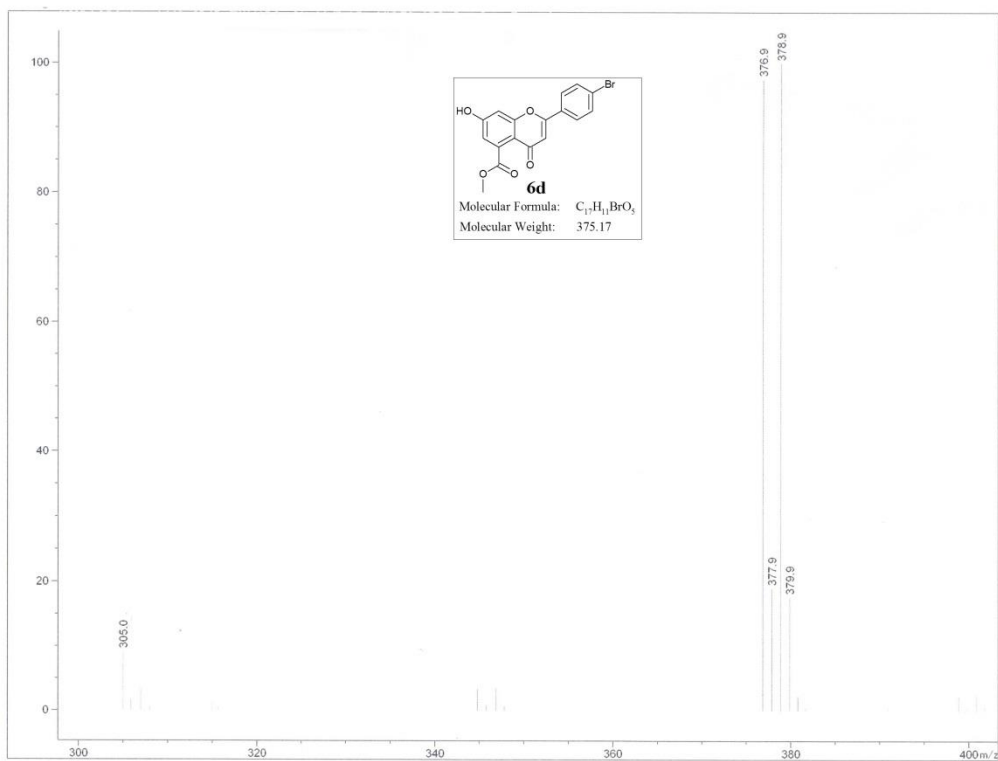

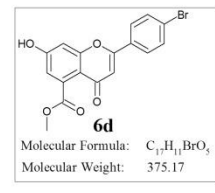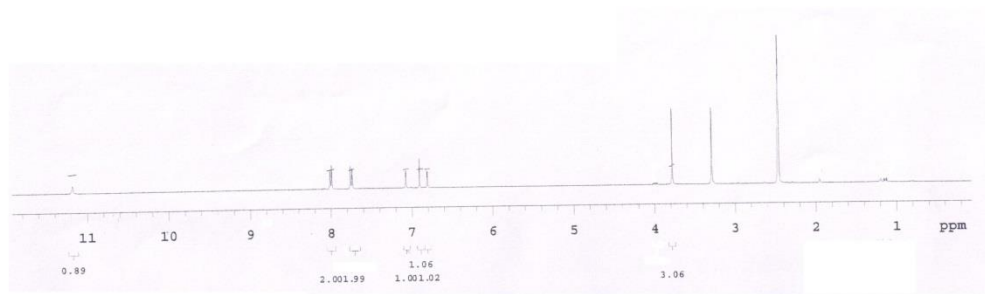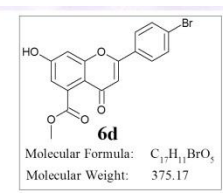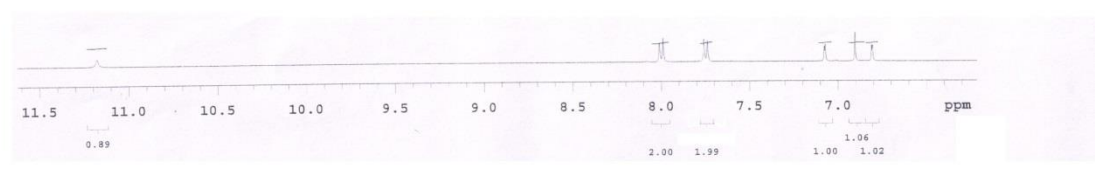

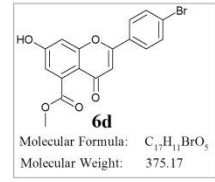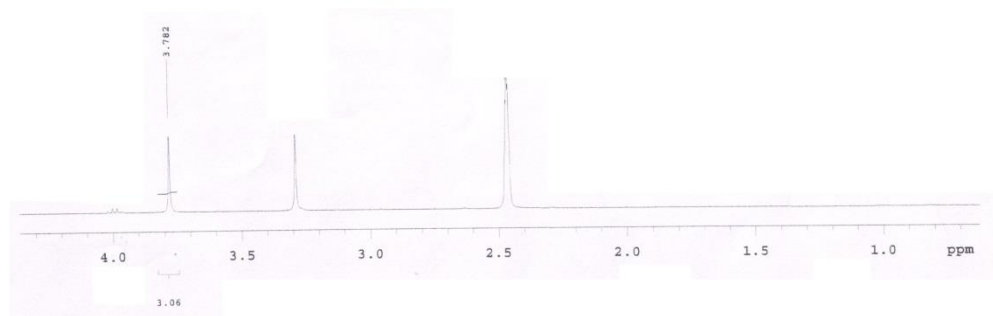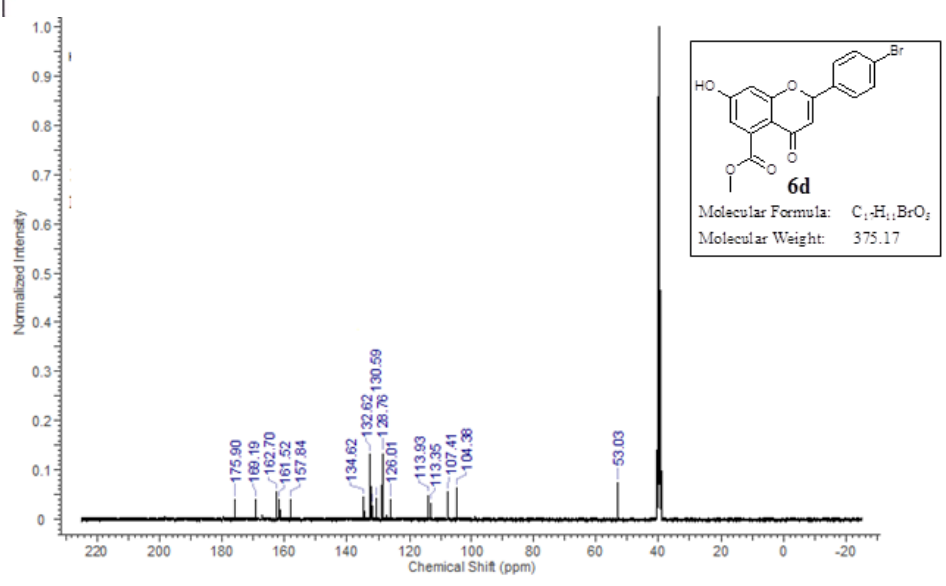

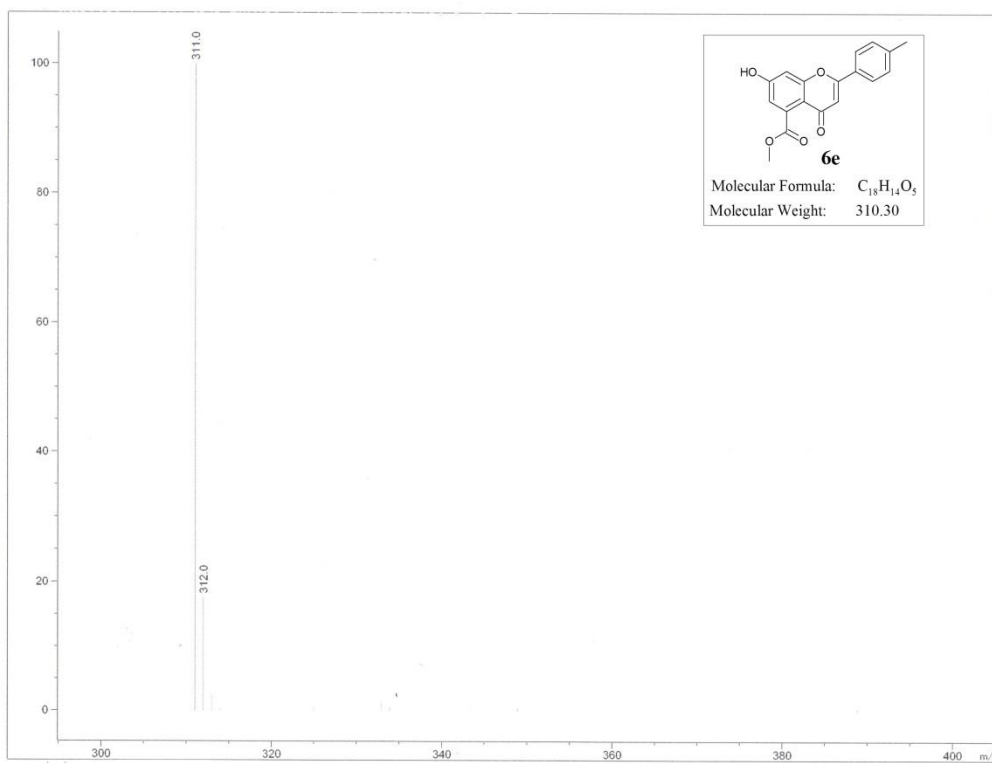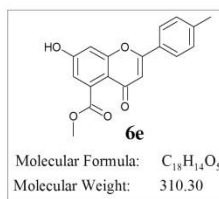

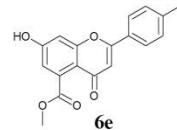

Molecular Formula:  $C_{18}H_{14}O_5$   
Molecular Weight: 310.30

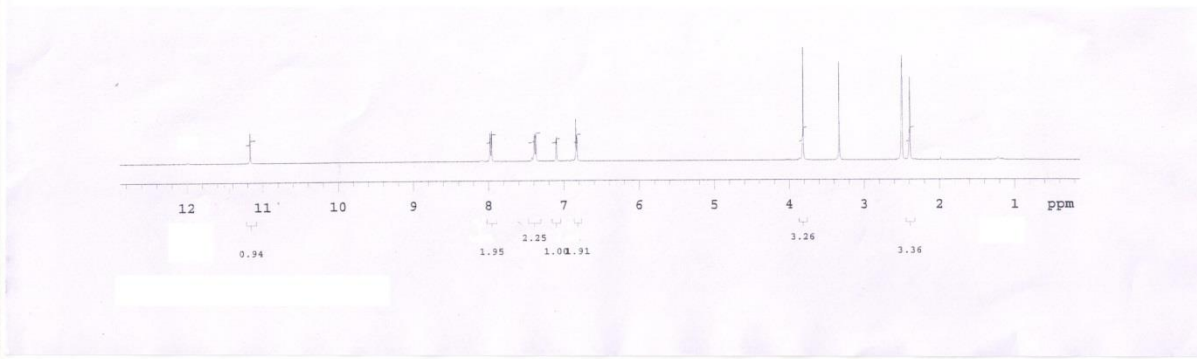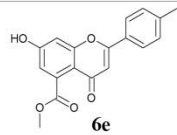

Molecular Formula:  $C_{18}H_{14}O_5$   
Molecular Weight: 310.30

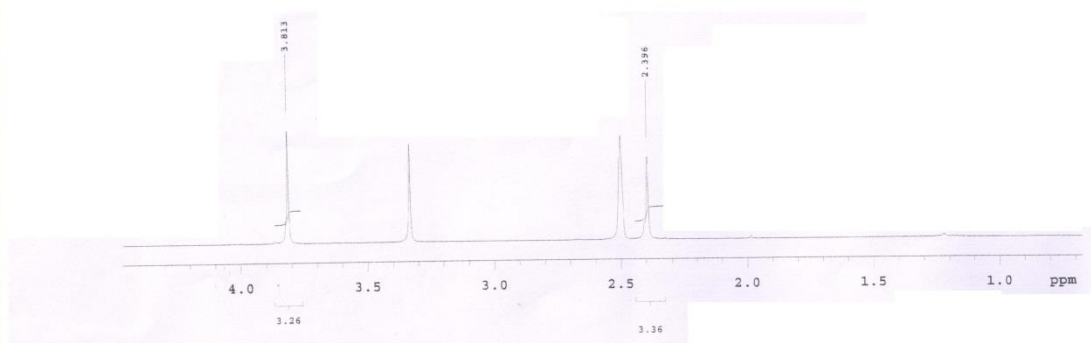

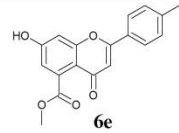

Molecular Formula:  $C_{18}H_{14}O_5$   
 Molecular Weight: 310.30

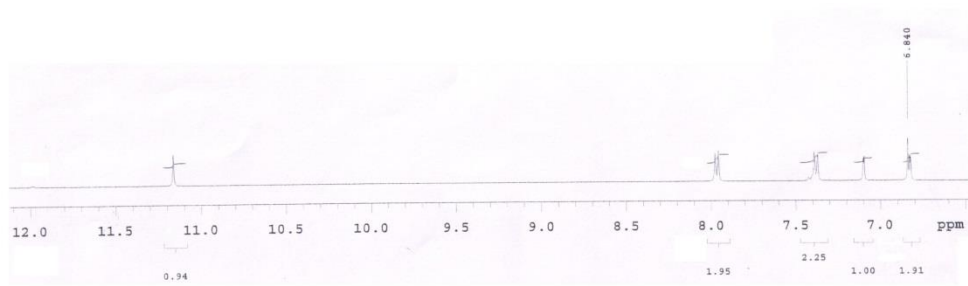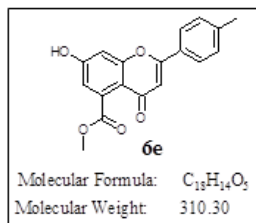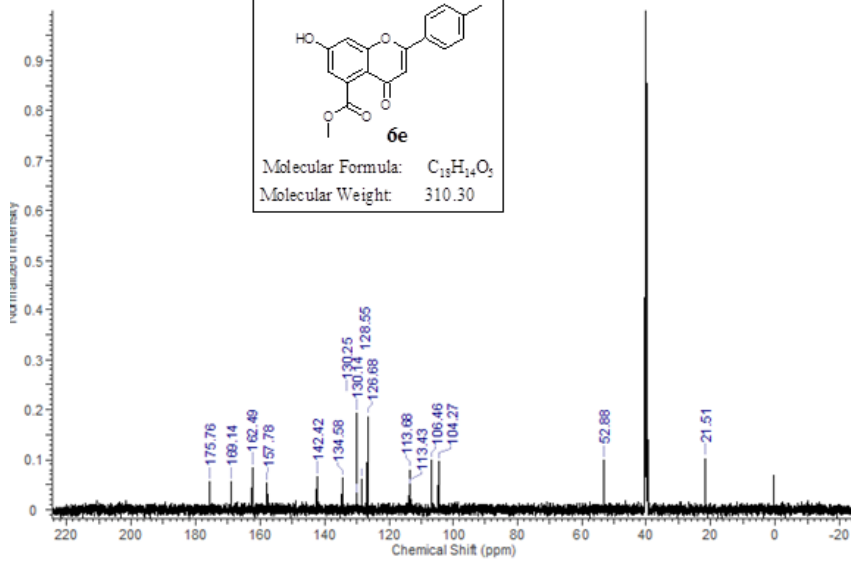

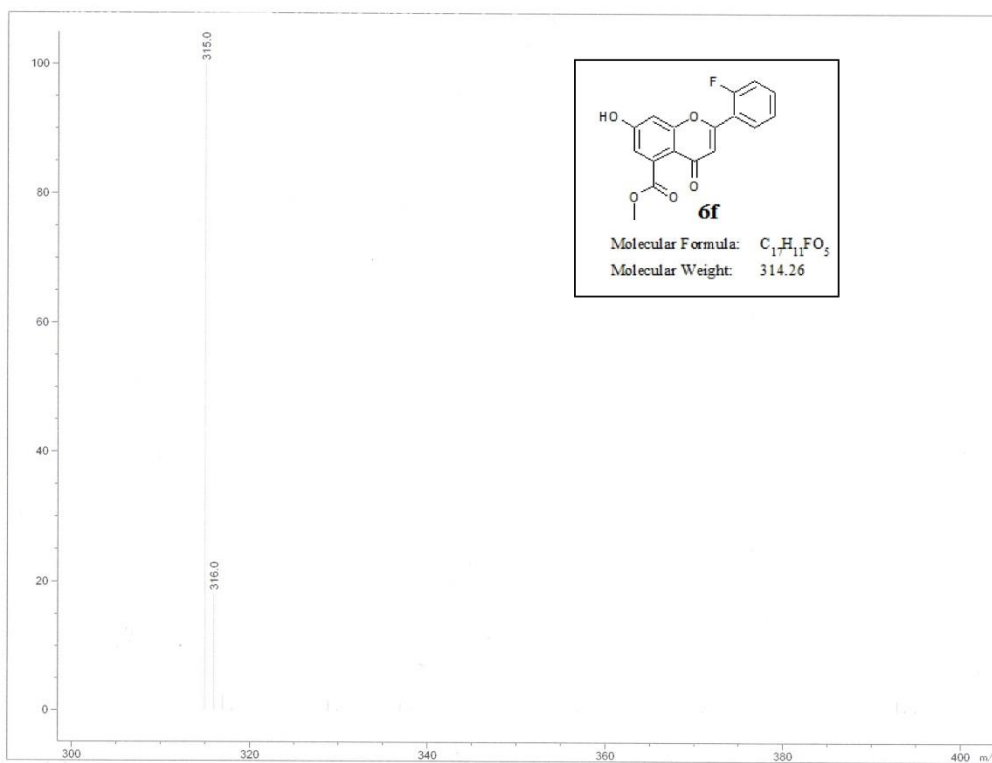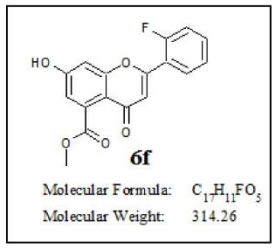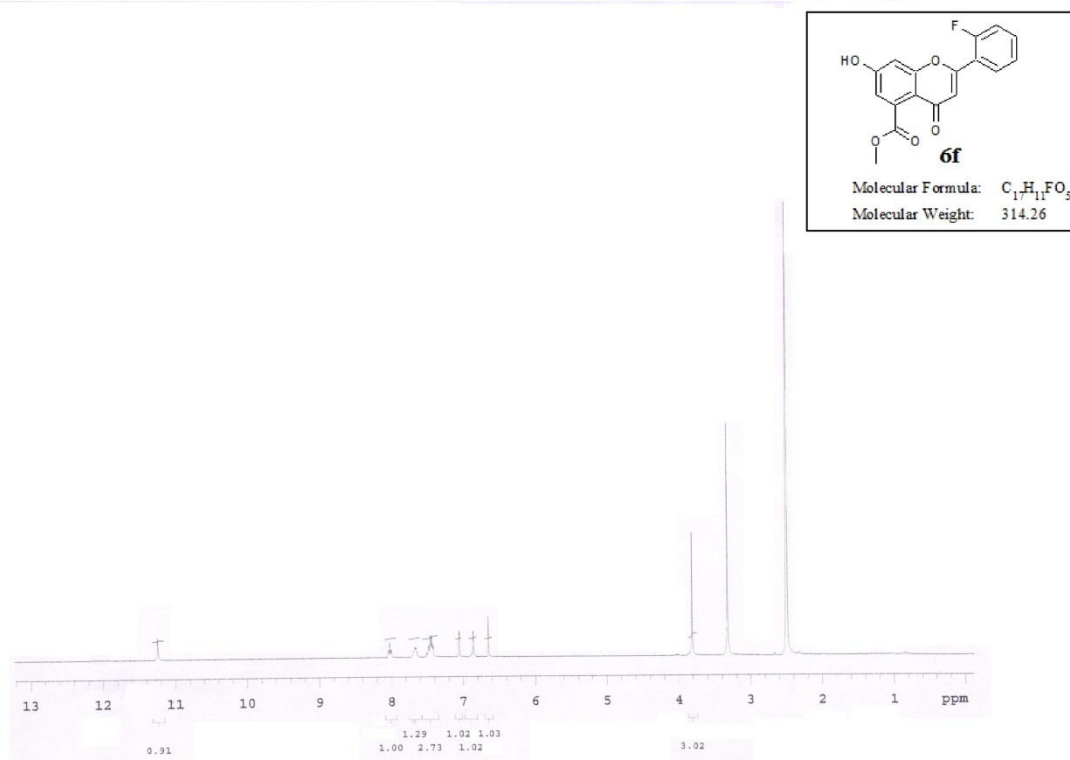

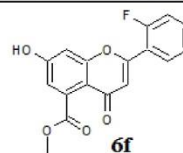

Molecular Formula:  $C_{11}H_{11}FO_5$   
 Molecular Weight: 314.26

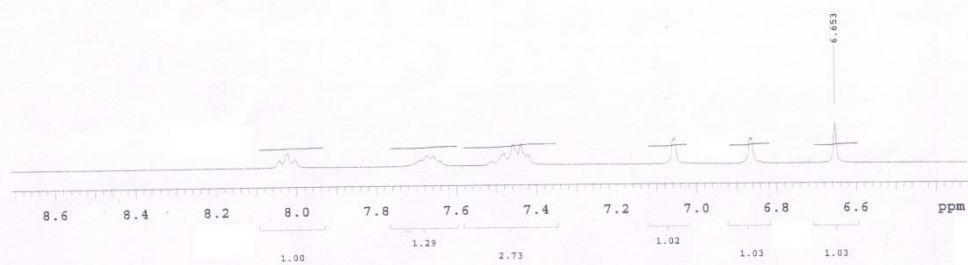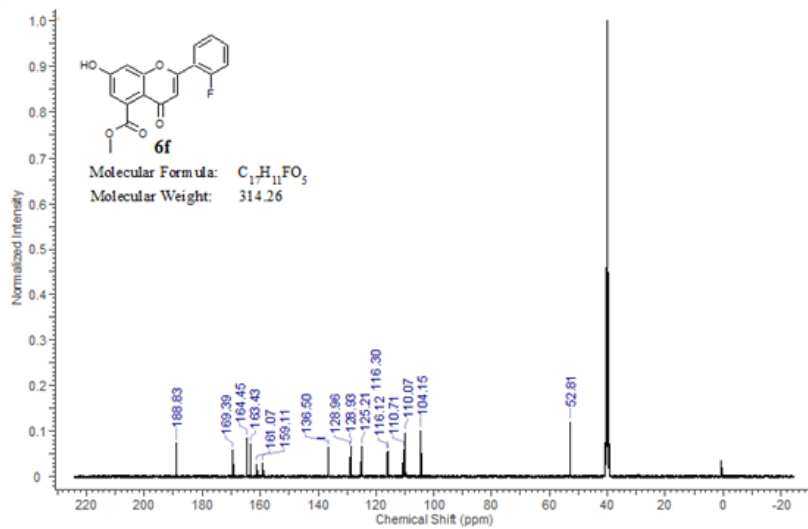

Supplement: c8ra00636a1.pdf [file c8ra00636a1.pdf]
